# Supplementary material for: Anti-Metastatic Function of Extracellular Vesicles Derived from Nanog-Overexpressing Melanoma
Source: MDPI journal article supplement (doi:10.3390/curroncol29020088), 2022-02-11
Supplement: s1 [file s1]

Article

# Anti-metastatic function of extracellular vesicles derived from Nanog-overexpressing melanoma

Tomohiro Hatakenaka<sup>1</sup>, Nahoko Matsuki<sup>1</sup>, Seiya Minagawa<sup>2</sup>, Celine Swee May Khoo<sup>1</sup> and Mikako Saito<sup>1,3\*</sup>

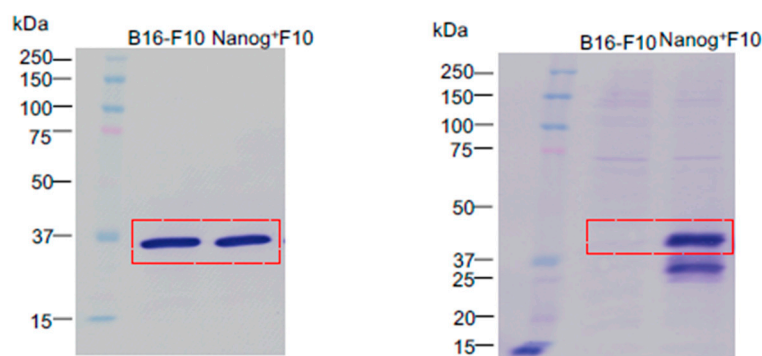

**Figure S1.** Full-length gel images for the data of Fig. 1A.

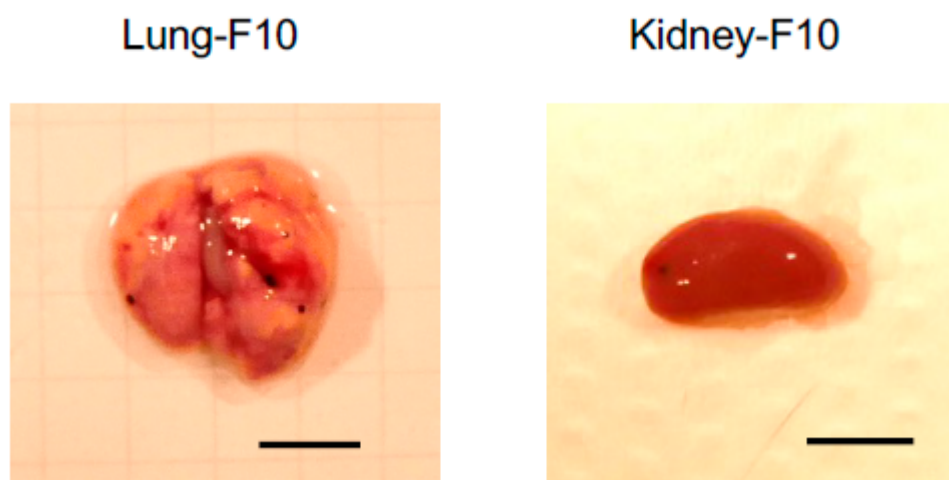

**Figure S2.** Examples of metastatic colonies found in Lung and kidney caused by F10 administration. Scale bar: 5 mm.

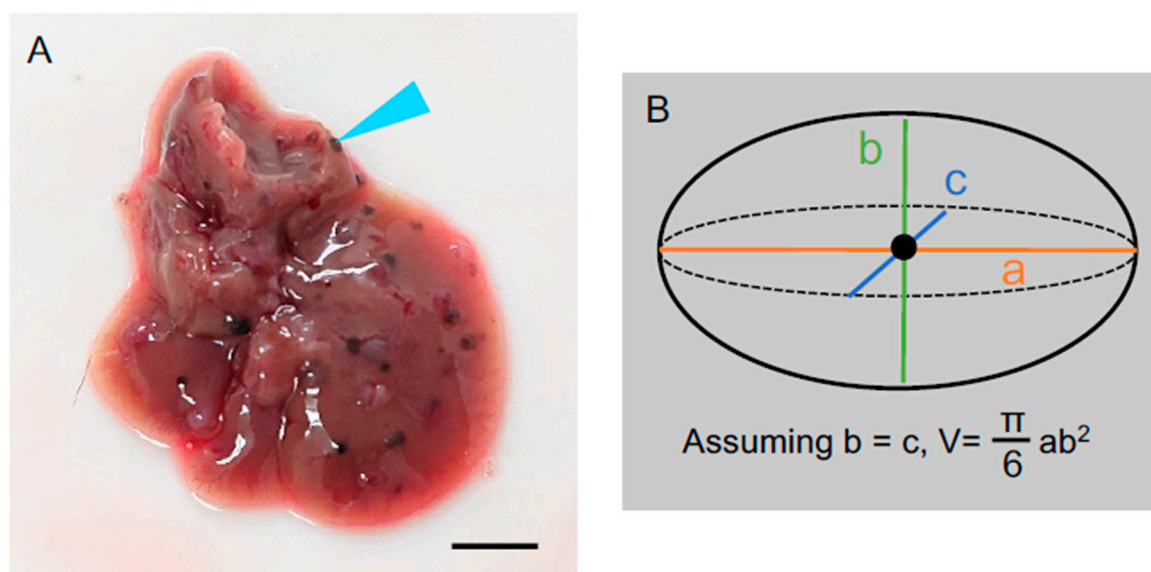

**Figure S3.** Figure S3. Determination of the volume of metastatic colony. (A) A photograph of liver. A blue triangle indicates a metastatic colony of Nanog+F10. Bar indicates 5 mm. (B) The shape of each colony was approximated as a spheroid and the following formula was used:  $V = (1/6) \pi ab^2$ , where a and b (= c) were the longest and shortest diameters, respectively.

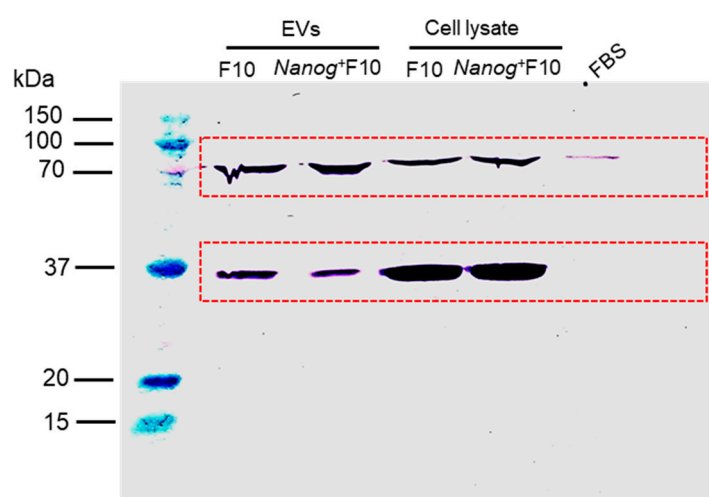

**Figure S4.** Full-length gel images for the data of Fig. 2A.

**Table S1.** Primers used for q-PCR.

| Genes  | Forward primers (5'→3')         | Reverse primers (5'→3')    |
|--------|---------------------------------|----------------------------|
| Nanog  | ATGCCTGCAGTTTTTCATCC            | GAGGCAGGTCCTCAGAGGAA       |
| EGFP   | GGGCACAAGCTGGAGTACAAC           | CACCTTGATGCCGTTCTTCTG      |
| puro   | TCACCGAGCTGCAAGAACTCT           | CCCACACCTTGCCGATGT         |
| TGF-β1 | ATACCAACTATTGCTTCAGCT<br>CCACAG | GTACTGTGTGTCCAGGCTCCAAATAT |
| F4/80  | CTTTGGCTATGGGCTTCCAGTCC         | GCAAGGAGGACAGAGTTTATCGTG   |
| CD68   | ACTTCGGGCCATGTTTCTCT            | GCTGGTAGGTTGATTGTCGT       |
| CD80   | CTGGGAAAAACCCCAAGAAG            | TGACAACGATGACGACGACTG      |
| CD86   | CATGGGCTTGGCAATCCTTA            | AAATGGGCACGGCAGATATG       |
| CD163  | GGCTAGACGAAGTCATCTGCAC          | CTTCGTTGGTCAGCCTCAGAGA     |
| CD206  | ATGCCAAGTGGGAAAATCTG            | TGTAGCAGTGGCCTGCATAG       |
